# Supplementary material
Source: Royal Society of Chemistry journal article supplement (doi:10.1039/d6tb00264a)
Supplement: d6tb00264a1.pdf [file d6tb00264a1.pdf]

## A Suturable Multilayered Fiber Scaffold Loaded with $\alpha$ -Ketoglutarate for Enhanced Bone Regeneration

Aolong Li <sup>a</sup>, Tingting Ma <sup>a</sup>, Siluo Dai <sup>a</sup>, Yiran Li <sup>a</sup>, Zhengyang Qin <sup>a</sup>, Yubao Li <sup>a\*</sup>, Jidong Li <sup>a\*</sup>

<sup>a</sup> Research Center for Nano-Biomaterials, Analytical & Testing Center, Sichuan University, Chengdu 610064, P.R. China.

\* Corresponding authors: [nic1979@scu.edu.cn](mailto:nic1979@scu.edu.cn) (J. Li), [nic7504@scu.edu.cn](mailto:nic7504@scu.edu.cn) (Y. Li).

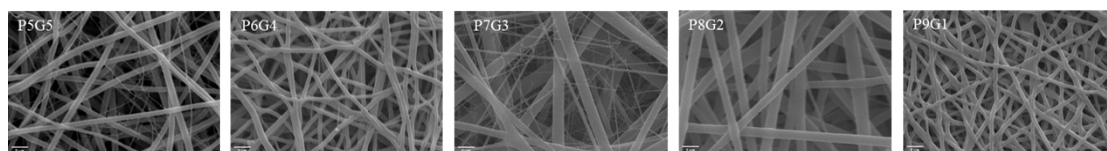

Figure S1 SEM images of different fibrous membranes.

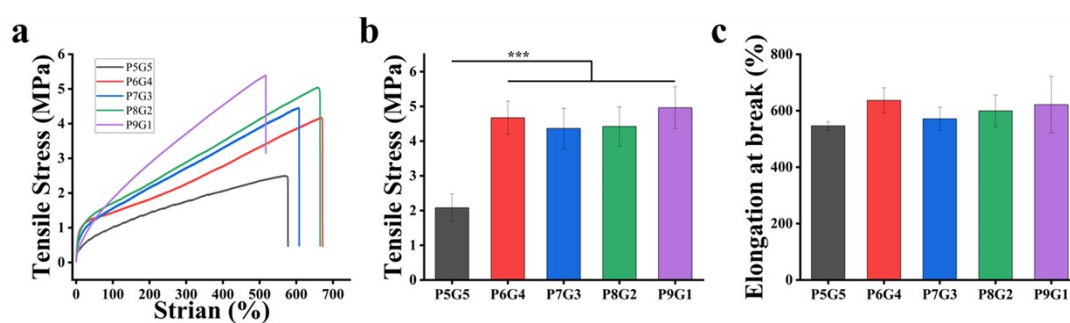

Figure S2 (a) Stress-strain curves of different fibrous membranes; (b) Tensile Stress; (c) Elongation at break.

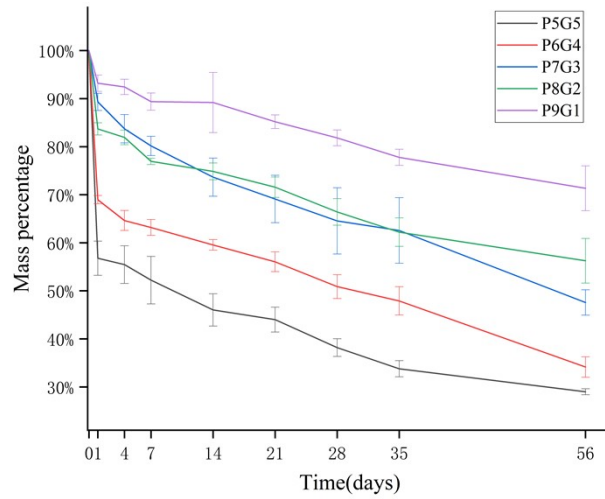

**Figure S3 In Vitro degradation of different fibrous membranes.**

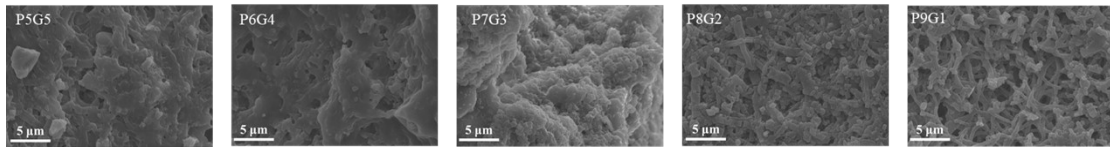

**Figure S4 SEM images of different fibrous membranes after 56 days of degradation**

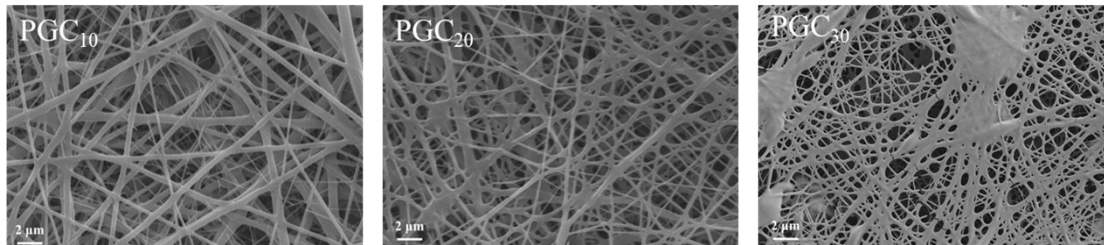

**Figure S5 SEM images of the PGC<sub>10</sub>, PGC<sub>20</sub> and PGC<sub>30</sub> fibrous membranes.**

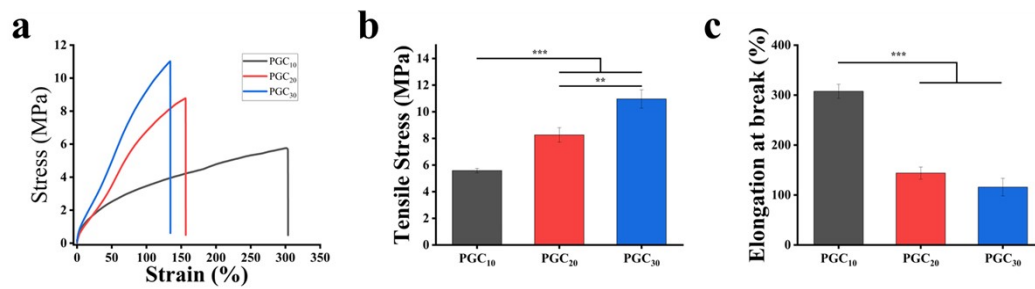

**Figure S6 (a) Stress-strain curves; (b) Elastic modulus; (c) Tensile strength of CPO**

loading membranes.

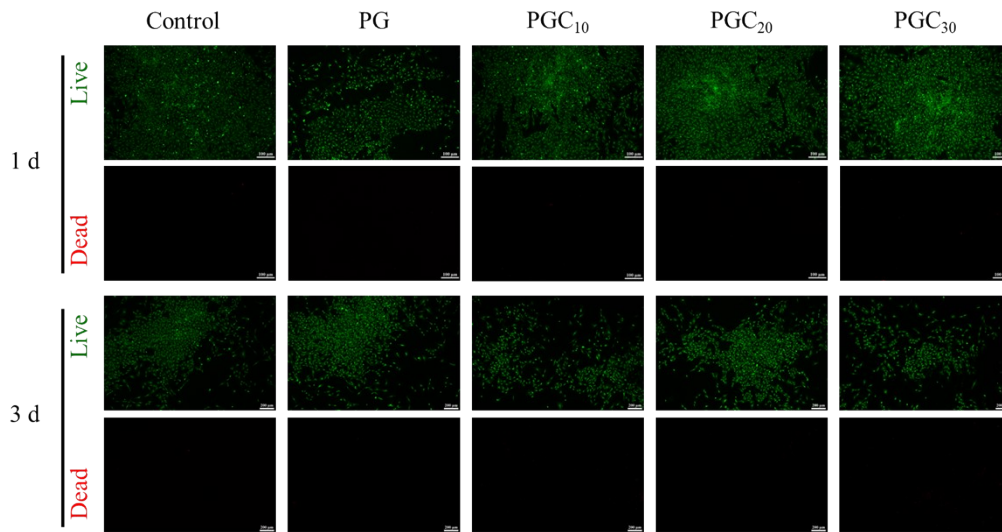

Figure S7 Live/Dead staining of BMSCs cultured in the scaffolds' extracts for 1 d and 3 d.

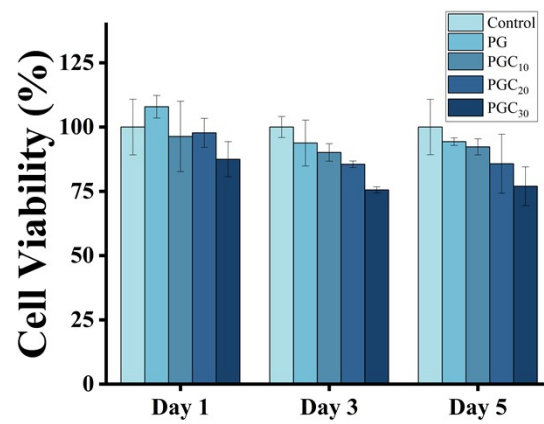

Figure S8 Cell viability of BMSCs cultured in extracts

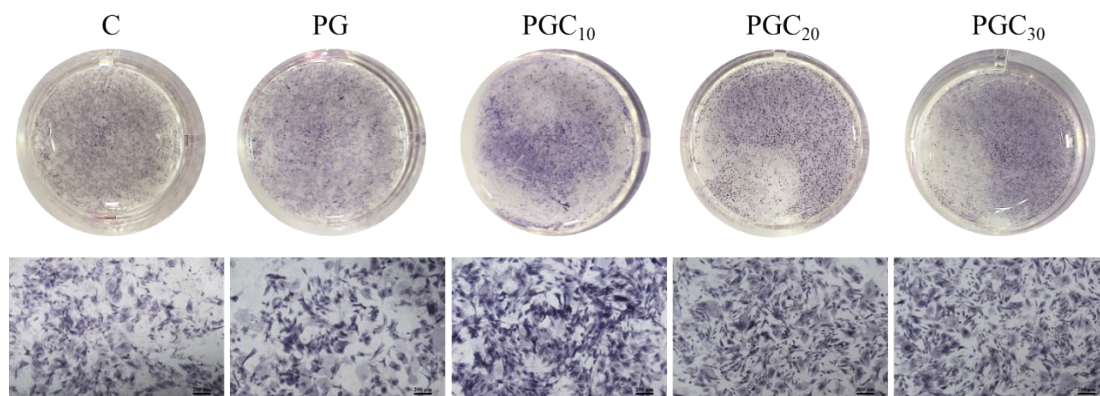

**Figure S9 ALP staining in each group**

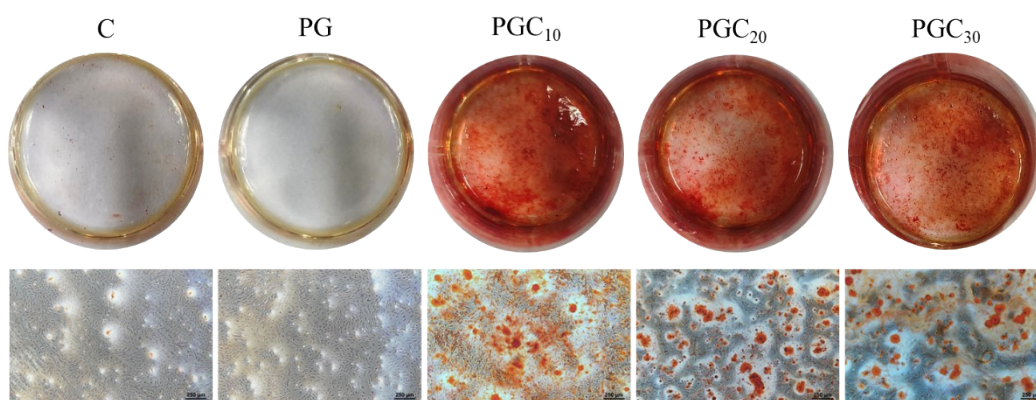

**Figure S10 ARS staining in each group**

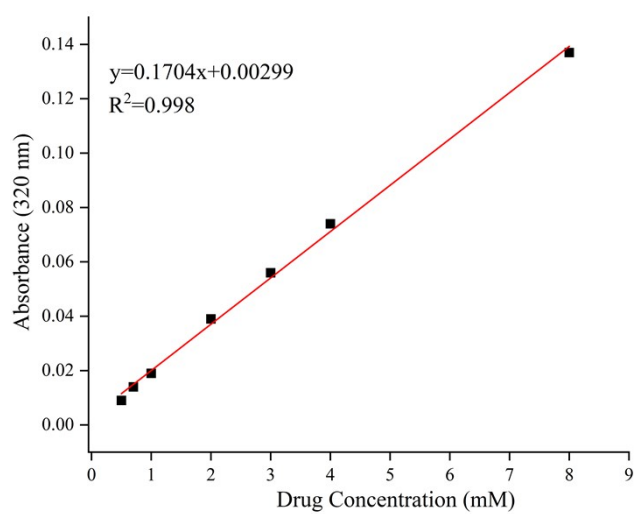

**Figure S11 Standard Curve of  $\alpha$ -Ketoglutarate**

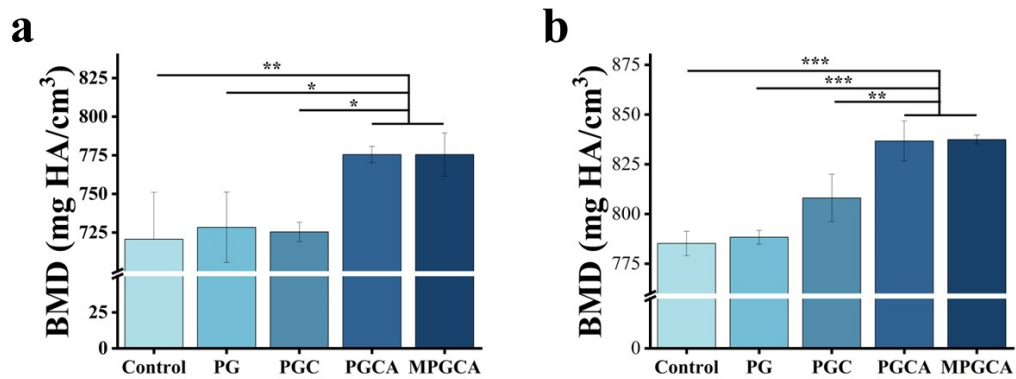

**Figure S12. Quantitative analysis of bone mineral density (BMD) in the defect area at (a) 4 and (b) 8 weeks post-implantation.**

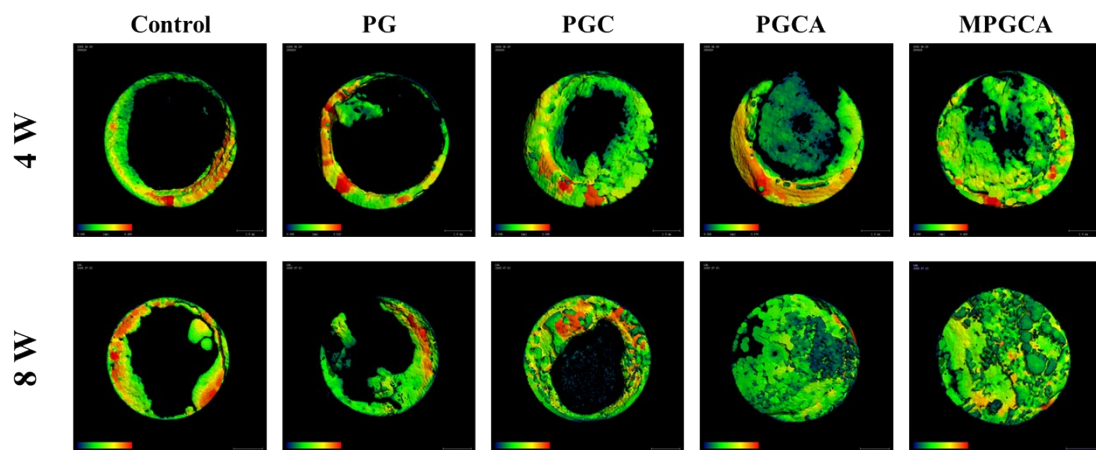

**Figure S13 Pseudo-color heatmaps of trabecular bone mineral density distribution in the defect area at 4 and 8 weeks post-implantation. Red indicates high mineral density, while green indicates low mineral density.**

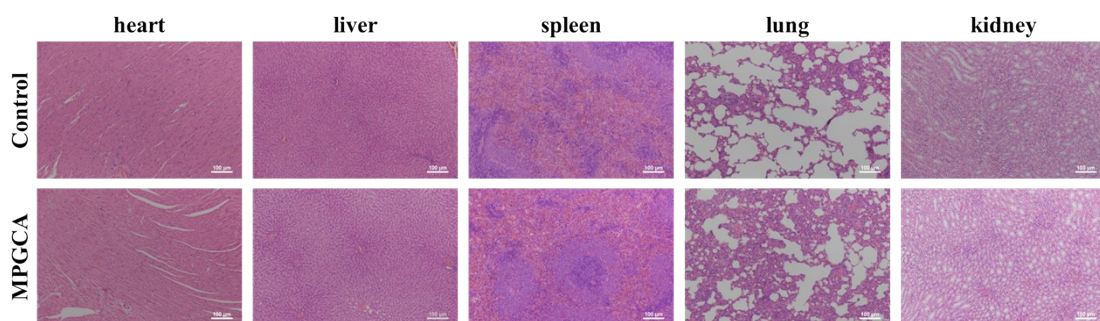

**Figure S14 H&E staining of major organs (heart, liver, spleen, lungs, kidneys) from the Control and MPGCA groups at 8 weeks.**

**Table S1. Primer sequences for real time PCR**

---

| <b>Gene</b> | <b>Forward primer</b>    | <b>Reverse primer</b>        |
|-------------|--------------------------|------------------------------|
| SP7         | GGAAAAGGAGGCACAAAGAAGC   | CACTAGGCAGGCAGTCAGAAGA       |
| Runx2       | TACCCAGGCGTATTTTCAGATGAT | TGTAAGTGAAGGTGGCTGGATAG<br>T |
| GAPDH       | CTGGAGAAACCTGCCAAGTATG   | GGTGGAAGAATGGGAGTTGCT        |

---
